# Supplementary material
Source: publisher figshare collection journal article supplement (https://acs.figshare.com/ndownloader/files/5123707)
Supplement: Supplementary file 1 [file 5123707]

# Supporting Information

## Titanium(IV) Citrate Speciation and Structure Under Environmentally and Biologically Relevant Conditions

*Joseph M. Collins, Ritika Uppal, Christopher D. Incarvito, Ann M. Valentine\**

Yale University Department of Chemistry, PO Box 208107, New Haven, CT, 06520

**Figure S1.** X-ray crystal structure of  $\text{Na}_8[\text{Ti}(\text{C}_6\text{H}_4\text{O}_7)_3] \cdot 17\text{H}_2\text{O}$  with counterions and lattice waters included.

**Figure S2.** Potentiometric titration data with overlaid fit from the program BEST (see article for reference) for citrate alone (+) ( $\sigma_{\text{fit}}=0.003759$ ) and for 3.8:1 citrate:Ti(IV) (●) ( $\sigma_{\text{fit}}=0.023319$ ). The value on the x-axis,  $a$ , represents the net moles of base added per mole of ligand.

**Table S1.** Comparison of goodness-of-fit ( $\sigma_{\text{fit}}$ ) values for representative least-square fits using the program BEST.

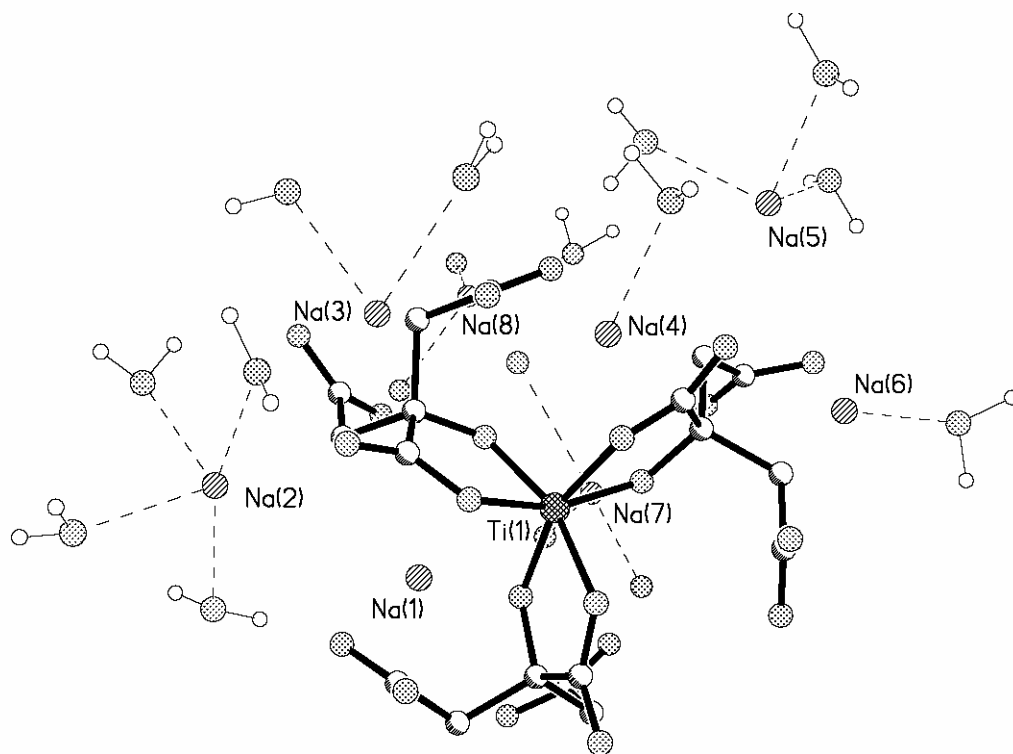

**Figure S1.** X-ray crystal structure of  $\text{Na}_8[\text{Ti}(\text{C}_6\text{H}_4\text{O}_7)_3] \cdot 17\text{H}_2\text{O}$  with counterions and lattice waters included.

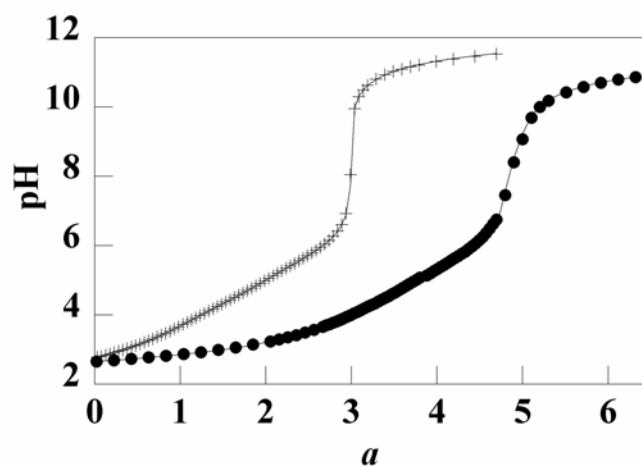

**Figure S2.** Potentiometric titration data with overlaid fit from the program BEST (see article for reference) for citrate alone (+) ( $\sigma_{\text{fit}}=0.003758$ ) and for 3.8:1 citrate:Ti(IV) (●) ( $\sigma_{\text{fit}}=0.023319$ ). The value on the x-axis,  $a$ , represents the net moles of base added per mole of ligand.

**Table S1.** Comparison of goodness-of-fit ( $\sigma_{\text{fit}}$ ) values for representative least-square fits using the program BEST.

| Description <sup>a</sup>                                           | Fitted species (in $\beta_{\text{LMH}}$ notation <sup>b</sup> )                                | $\sigma_{\text{fit}}$ |
|--------------------------------------------------------------------|------------------------------------------------------------------------------------------------|-----------------------|
| titration of ligand alone <sup>c</sup>                             | $\beta_{101}, \beta_{102}, \beta_{103}$                                                        | 0.003758              |
| reported speciation <sup>d</sup>                                   | $\beta_{110}, \beta_{313}, \beta_{311}, \beta_{31-1}, \beta_{31-3}, \beta_{21-4}$              | 0.023319              |
| unevenly-charged 3:1 complexes                                     | $\beta_{110}, \beta_{312}, \beta_{310}, \beta_{31-2}, \beta_{31-3}, \beta_{21-4}$              | 0.028478              |
| all reasonable 3:1 complexes                                       | $\beta_{313}, \beta_{312}, \beta_{311}, \beta_{310}, \beta_{31-1}, \beta_{31-2}, \beta_{31-3}$ | 0.029345              |
| six 2:1 species                                                    | $\beta_{212}, \beta_{211}, \beta_{210}, \beta_{21-1}, \beta_{21-2}, \beta_{21-4}$              | 0.050255              |
| starting with 20 reasonable species (none hydrolytic) <sup>e</sup> | $\beta_{110}, \beta_{11-3}, \beta_{313}, \beta_{310}, \beta_{31-3}, \beta_{21-4}$              | 0.079971              |
| hydrolytic ( $\text{TiOH}_n^{4-n}$ ) species only                  | $\beta_{01-1}, \beta_{01-2}, \beta_{01-3}, \beta_{01-4}, \beta_{01-5}, \beta_{01-6}$           | $>0.15^f$             |

<sup>a</sup> All of the data in this table were generated from the L:M 3.8:1 titration. The following were held as constants for all fits:  $\text{cit}_{\text{total}} = 0.0500 \text{ mmol}$ ;  $\text{Ti}^{4+}_{\text{total}} = 0.0128 \text{ mmol}$ ; titrateable  $\text{H}^{+}_{\text{total}} = 0.200 \text{ mmol}$ ;  $\text{xsH} = 0.1412 \text{ mmol}$ ;  $\log \beta_{101} = 5.6753$ ;  $\log \beta_{102} = 9.9861$ ;  $\log \beta_{103} = 12.8700$ ;  $\log \beta_{00-1} = -13.79$ .

<sup>b</sup>  $\text{L} = \text{Hcit}^{3-}$ ;  $\text{M} = \text{Ti}^{4+}$ ;  $\text{H} = \text{H}^{+}$ .

<sup>c,d</sup> See overlay of these fits with the respective experimental data in Figure S2.

<sup>e</sup> 6 1:1 species, 7 2:1 species, 7 3:1 species; all but six were ultimately rejected as being insignificant by the fitting algorithm. The inherent problem with this approach is the initial estimates made for the  $\log \beta$  values; some bias, if introduced here, can lead to “random” minimizations, where reasonable fits are obtained for unreasonable models.

<sup>f</sup> Depending on the starting values, optimization eliminated all but 2 or 3 of these and they only fit the beginning and end of the experimental pH range.
